# Supplementary material
Source: Springer Nature journal article supplement (http://www.springermedizin.de/resource/supplementary/12891_2007_353_MOESM5_ESM.pdf/9511122)

## Survival of the Nottingham Total Shoulder Replacement Prosthesis (1994-1997)

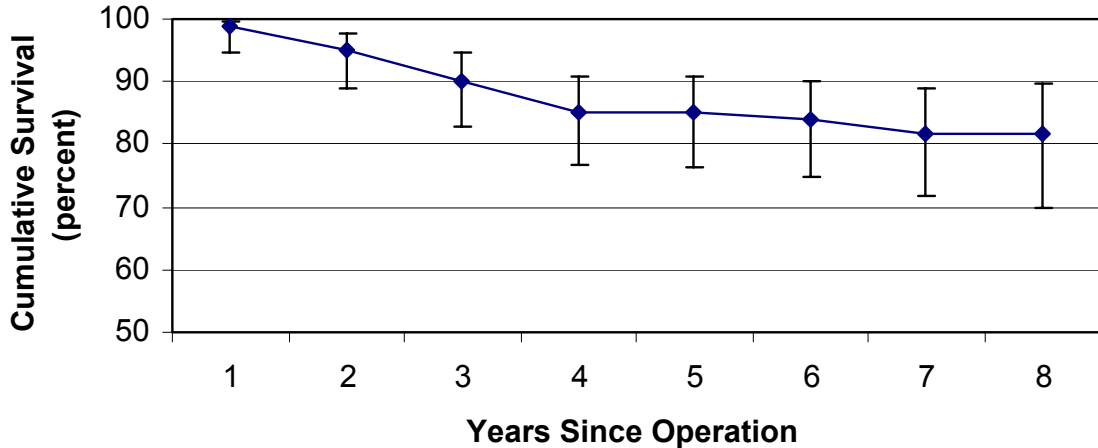

Supplement: MOESM5 [file 9511122]
